# Supplementary material for: Estimating the ratio of fatal to non-fatal overdoses involving all drugs, all opioids, synthetic opioids, heroin or stimulants, USA, 2010–2020
Source: HighWire-hosted journal article supplement (doi:10.1136/ip-2023-045091), 2024-01-30
Supplement: ip-2023-045091supp001_data_supplement.pdf [file ip-2023-045091supp001_data_supplement.pdf]

## Supplement

**Box 1a.** HCUP NEDS data from 2010–2020 were queried for the following ICD-9-CM and ICD-10-CM codes that indicate a drug overdose in the diagnosis and external cause of injury fields\*

| Drug type                | ICD-9-CM codes                                                                   | ICD-10-CM codes                                                                             |                                                                                                                                                                                                                                                                                                                                                                                                                      |
|--------------------------|----------------------------------------------------------------------------------|---------------------------------------------------------------------------------------------|----------------------------------------------------------------------------------------------------------------------------------------------------------------------------------------------------------------------------------------------------------------------------------------------------------------------------------------------------------------------------------------------------------------------|
| <b>All drug</b>          | 960-979; E850-E858; and E9800-E9805                                              | T36–T50                                                                                     | <b>And a 5<sup>th</sup>/6<sup>th</sup> character of</b> <ul style="list-style-type: none"> <li>• 1: Accidental (unintentional)</li> <li>• 2: Intentional self-harm</li> <li>• 3: Assault</li> <li>• 4: Undetermined intent</li> </ul><br><b>And a 7<sup>th</sup> character of:</b> <ul style="list-style-type: none"> <li>• A: Initial encounter</li> <li>• D: Subsequent encounter</li> <li>• S: Sequela</li> </ul> |
| <b>All opioids</b>       | 96500, 96501, 96502, 96509, E8500, E8501, E8502                                  | T40.0X, T40.1X, T40.2X, T40.3X, T40.4X, T40.41, T40.42, T40.49, <sup>†</sup> T40.60, T40.69 |                                                                                                                                                                                                                                                                                                                                                                                                                      |
| <b>Synthetic opioids</b> | Not applicable                                                                   | T40.4X, T40.41, T40.42, T40.49 <sup>†</sup>                                                 |                                                                                                                                                                                                                                                                                                                                                                                                                      |
| <b>Heroin</b>            | 96501, E8500                                                                     | T40.1X                                                                                      |                                                                                                                                                                                                                                                                                                                                                                                                                      |
| <b>Stimulants</b>        | 96970, 96971, 96972, 96973, 96979, 9700, 97081, 97089, 9709, E8542, E8543, E8552 | T40.5X, T43.60, T43.61, T43.62, T43.63, T43.64, T43.69                                      |                                                                                                                                                                                                                                                                                                                                                                                                                      |

\* ICD-10-CM codes were implemented in October 2015; for this analysis, ICD-9-CM codes were queried from Q1 2010–Q3 2015 and ICD-10-CM codes were queried for Quarter 4 2015–Q4 2020. Beginning in 2017, the external cause of injury fields were included with other diagnoses and no longer retained in separate data elements. To minimize the impact of the ICD-9-CM to ICD-10-CM coding change that occurred during the study period (October 1, 2015), all intents (unintentional, intentional self-harm, assault, and undetermined) and encounters (initial, subsequent, and sequela) were included. ICD-9-CM drug poisoning codes did not capture information on intentionality or whether the encounter was for an initial, subsequent, or sequela visit. Surveillance of nonfatal overdose using ICD-10-CM codes typically is restricted to initial encounters (i.e., to only capture acute drug overdose visits) and stratified by intentionality. To ensure consistency in how the data were analyzed during the study period (which encompassed both ICD-9-CM and ICD-10-CM coding), all intents and encounters were included.

<sup>†</sup> Beginning October 2020, the ICD-10-CM code for poisonings involving synthetic narcotics (T40.4X) was retired and three new codes were implemented for fentanyl (T40.41), tramadol (T40.42), and other synthetic narcotics (T40.49).
